# Supplementary material
Source: Springer Nature journal article supplement (https://www.springermedizin.de/resource/supplementary/12967_2014_1821_MOESM1_ESM.pdf/9574908)

A

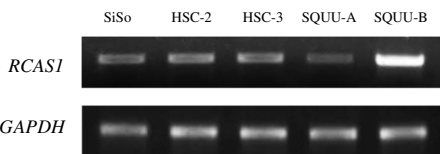

B

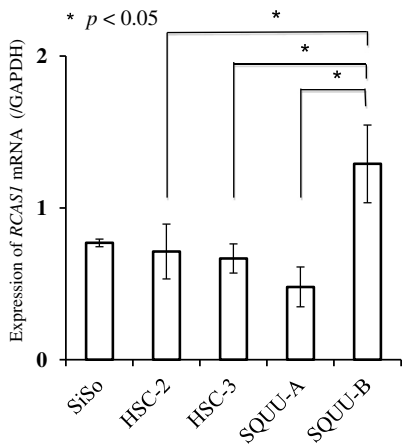

C

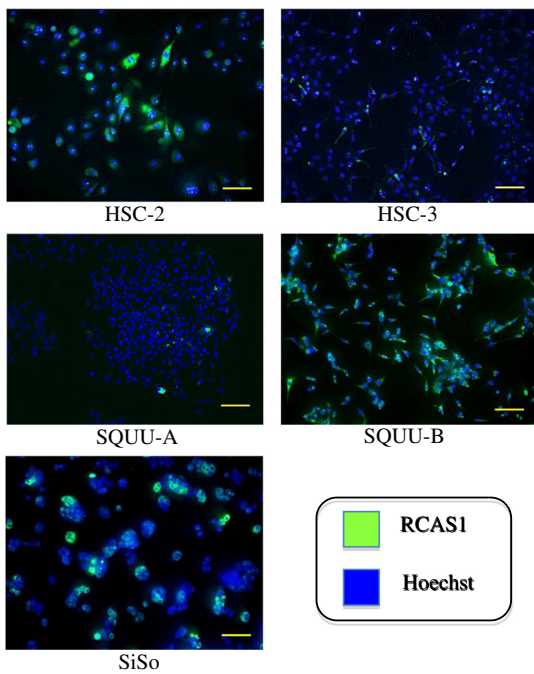

Supplement: MOESM1 [file 9574908]
